# Supplementary material for: New organic semiconductors and their device performance as a function of thiophene orientation
Source: Royal Society of Chemistry journal article supplement (doi:10.1039/b512191d), 2005-12-02
Supplement: b512191d.pdf [file b512191d.pdf]

## Supporting Information

### New Organic Semiconductors and their Device Performance as a Function of Thiophene Orientation

Brigitte Wex,<sup>a</sup> Bilal R. Kaafarani,<sup>b</sup> Raoul Schroeder,<sup>c</sup> Leszek A. Majewski,<sup>c</sup> Pannee Burckel,<sup>d</sup> Martin Grell<sup>c</sup> and Douglas C. Neckers<sup>\*a</sup>

<sup>a</sup> Bowling Green State University, Center for Photochemical Sciences, 132 Overman Hall, Bowling Green, OH, U.S.A.. Fax: 419-372-0366; Tel: 419-372-2420; E-mail: neckers@photo.bgsu.edu

<sup>b</sup> American University of Beirut, Department of Chemistry, Beirut, Lebanon. Fax: 961 1 365 217; Tel: 961 3 151451; E-mail: bilal.kaafarani@aub.edu.lb

<sup>c</sup> University of Sheffield, Department of Physics, Houndsfield Road, Sheffield, S3 7RH, U.K. Fax: 11 4272 8079; Tel: 11 4222 3589; E-mail: M.Grell@sheffield.ac.uk

<sup>d</sup> University of Toledo, Department of Chemistry, 2801 W. Bancroft St., Toledo, OH 43606, U.S.A. Fax: 419-530-4033, Tel. 419-530-4591; E-mail: pburcke@utnet.utoledo.edu

#### Table of Contents:

| Object    | Title                                                                                                              | Page        |
|-----------|--------------------------------------------------------------------------------------------------------------------|-------------|
| Figure S1 | Output characteristic of <b>2</b> .                                                                                | <b>S2</b>   |
| Figure S2 | Mobility plot of <b>1</b> and <b>2</b> .                                                                           | <b>S2</b>   |
| Table S1  | Experimental parameters for thin film XRD acquisition.                                                             | <b>S3</b>   |
| Table S2  | Thin film XRD data and calculated d-spacings of <b>1</b> .                                                         | <b>S4</b>   |
| Table S3  | Powder pattern simulated from <b>1</b> single-crystal data (CCDC254385.cif) with Cu K-alpha1 radiation (1.5406 Å). | <b>S5-8</b> |
| Table S4  | Thin film XRD data and calculated d-spacings of <b>2</b> .                                                         | <b>S9</b>   |
| Table S5  | Indexed thin film diffraction data of <b>2</b> .                                                                   | <b>S10</b>  |

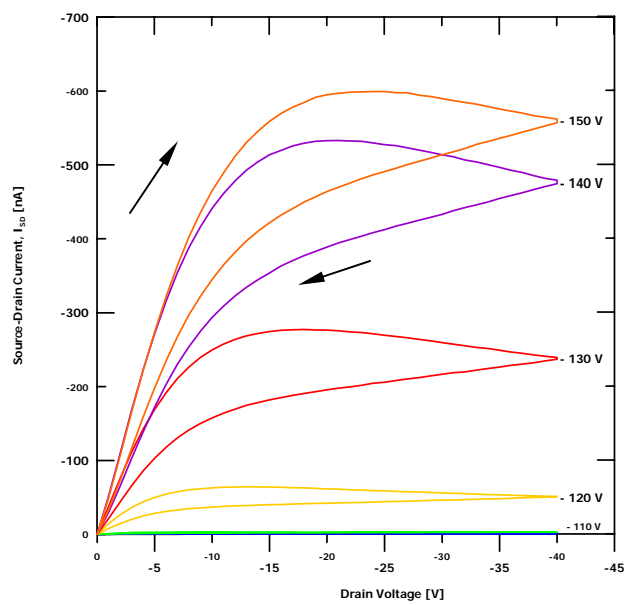

**Figure S1.** Output characteristic of **2** (180 nm, 75 °C) on OTS-treated p-Si/SiO<sub>2</sub> (300 nm).

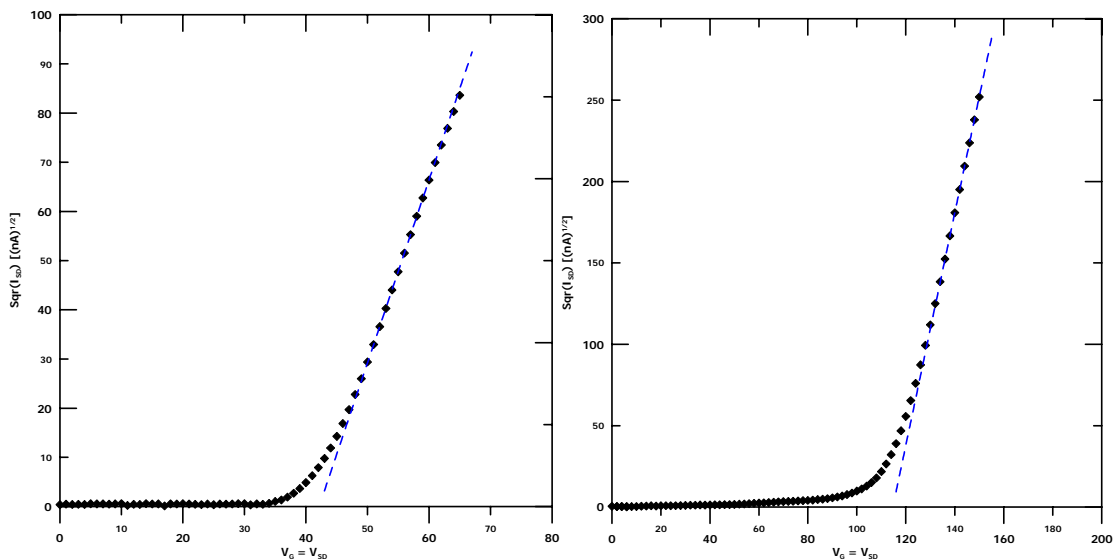

**Figure S2.** Mobility plot of **1** (left;  $C_i = 32.1 \text{ nFcm}^{-2}$ ,  $\mu = 0.011 \text{ cm}^2\text{V}^{-1}\text{s}^{-1}$  and **2** (right;  $C_i = 11.3 \text{ nF/cm}^2$ ,  $\mu = 0.12 \text{ cm}^2\text{V}^{-1}\text{s}^{-1}$ ).

## Experimental Details and Data tables

Thin films of **1** (60 nm) and **2** (180 nm) were analyzed by X-ray diffractometry (XRD) using standard  $\theta$ - $2\theta$  scan with Cu  $K\alpha$  radiation. The data were acquired on a PANalytical X'Pert Pro diffractometer in the Instrumentation Center, College of Arts and Sciences, University of Toledo, OH. The experimental parameters and results are summarized in Tables S1-S5.

**Table S1.** Experimental parameters for thin film XRD acquisition.

|                                                |                         |
|------------------------------------------------|-------------------------|
| Stage                                          | Flat stage              |
| Configuration                                  | Flat stage              |
| Goniometer                                     | PW3050/60 (Theta/Theta) |
| Minimum step size 2Theta                       | 0.001                   |
| Minimum step size Omega                        | 0.001                   |
| Sample stage                                   | PW3071/xx Bracket       |
| Diffractometer system                          | XPERT-PRO               |
| Measurement program                            | pbBB004Xflat            |
| Scan Axis                                      | Gonio                   |
| Start (End) Position [ $^{\circ}2\theta$ .]    | 3.0084 (64.9904)        |
| Step Size [ $^{\circ}2\theta$ .]               | 0.0170                  |
| Scan Step Time [s]                             | 10.3355                 |
| Scan Type                                      | Continuous              |
| PSD Mode                                       | Scanning                |
| PSD Length [ $^{\circ}2\theta$ .]              | 2.12                    |
| Offset [ $^{\circ}2\theta$ .]                  | 0.0000                  |
| Divergence Slit Type                           | Fixed                   |
| Divergence Slit Size [ $^{\circ}$ ]            | 0.1196                  |
| Specimen Length [mm]                           | 10.00                   |
| Measurement Temperature [ $^{\circ}\text{C}$ ] | 25.00                   |
| Anode Material                                 | Cu                      |
| K-Alpha1 [ $\text{\AA}$ ]                      | 1.54060                 |
| K-Alpha2 [ $\text{\AA}$ ]                      | 1.54443                 |
| K-Beta [ $\text{\AA}$ ]                        | 1.39225                 |
| K-A2 / K-A1 Ratio                              | 0.50000                 |
| Generator Settings                             | 40 mA, 45 kV            |
| Diffractometer Type                            | 0000000000030813        |
| Diffractometer Number                          | 0                       |
| Goniometer Radius [mm]                         | 240.00                  |
| Dist. Focus-Diverg. Slit [mm]                  | 91.00                   |
| Incident Beam Monochromator                    | No                      |
| Spinning                                       | No                      |
| Dist. focus to div. slit                       | 91.00000                |
| Irradiated length                              | 10.00000                |
| Spinner used                                   | No                      |
| Receiving slit size                            | 0.10000                 |
| Step axis value                                | 0.00000                 |
| Offset                                         | 0.00000                 |
| Sample length                                  | 10.00000                |

**Table S2.** Thin film XRD data and calculated d-spacings of **1**.

| Pos. /°2Th. | Height /cts | FWHM /°2Th. | d-spacing/Å | Rel. Int. /% |
|-------------|-------------|-------------|-------------|--------------|
| 6.8433      | 420.25      | 0.0727      | 12.90646    | 100.00       |
| 13.6589     | 84.36       | 0.1006      | 6.47777     | 20.07        |
| 20.5205     | 249.40      | 0.1080      | 4.32462     | 59.35        |

Pos. = peak position; Rel. Int. = relative intensity.

**Table S3.** Powder pattern simulated from **1** single-crystal data (CCDC254385.cif) with Cu K-alpha1 radiation (1.5406 Å).

| #  | h | k | l | m | 2-theta (c)/° | 2-theta (o)/° | d-sp(c)/Å | Intensity  | F     |
|----|---|---|---|---|---------------|---------------|-----------|------------|-------|
| 1  | 2 | 0 | 0 | 2 | 6.878         | 6.84          | 12.8407   | 215482     | 20    |
| 2  | 4 | 0 | 0 | 2 | 13.782        | 13.66         | 6.4204    | 36597      | 16    |
| 3  | 0 | 1 | 0 | 2 | 14.563        |               | 6.0774    | 703.41     | 2.41  |
| 4  | 1 | 1 | 0 | 4 | 14.968        |               | 5.9141    | 344738.92  | 38.73 |
| 5  | 2 | 1 | 0 | 4 | 16.122        |               | 5.4932    | 398113.24  | 44.89 |
| 6  | 3 | 1 | 0 | 4 | 17.885        |               | 4.9556    | 280981.07  | 41.95 |
| 7  | 4 | 1 | 0 | 4 | 20.102        |               | 4.4136    | 88060.67   | 26.49 |
| 8  | 6 | 0 | 0 | 2 | 20.736        | 20.52         | 4.2802    | 182494.63  | 55.69 |
| 9  | 5 | 1 | 0 | 4 | 22.648        |               | 3.9229    | 133.86     | 1.17  |
| 10 | 1 | 0 | 1 | 4 | 23.100        |               | 3.8472    | 548942.65  | 76.42 |
| 11 | 3 | 0 | 1 | 4 | 25.119        |               | 3.5423    | 570052.68  | 85.02 |
| 12 | 6 | 1 | 0 | 4 | 25.432        |               | 3.4994    | 49800.82   | 25.46 |
| 13 | 0 | 1 | 1 | 4 | 27.191        |               | 3.2770    | 601759.11  | 94.98 |
| 14 | 1 | 1 | 1 | 8 | 27.416        |               | 3.2506    | 1005864.74 | 87.59 |
| 15 | 8 | 0 | 0 | 2 | 27.768        |               | 3.2102    | 1234.97    | 6.22  |
| 16 | 2 | 1 | 1 | 8 | 28.080        |               | 3.1752    | 20875.38   | 12.94 |
| 17 | 7 | 1 | 0 | 4 | 28.394        |               | 3.1408    | 73368.98   | 34.73 |
| 18 | 5 | 0 | 1 | 4 | 28.761        |               | 3.1016    | 15355.70   | 16.11 |
| 19 | 3 | 1 | 1 | 8 | 29.156        |               | 3.0604    | 209888.26  | 42.72 |
| 20 | 0 | 2 | 0 | 2 | 29.369        |               | 3.0387    | 46587.65   | 40.57 |
| 21 | 1 | 2 | 0 | 4 | 29.579        |               | 3.0176    | 44385.79   | 28.21 |
| 22 | 2 | 2 | 0 | 4 | 30.199        |               | 2.9570    | 13763.43   | 16.06 |
| 23 | 4 | 1 | 1 | 8 | 30.605        |               | 2.9188    | 35407.86   | 18.48 |
| 24 | 3 | 2 | 0 | 4 | 31.209        |               | 2.8636    | 49282.50   | 31.49 |
| 25 | 8 | 1 | 0 | 4 | 31.492        |               | 2.8385    | 56895.77   | 34.17 |
| 26 | 5 | 1 | 1 | 8 | 32.381        |               | 2.7626    | 36193.01   | 19.86 |
| 27 | 4 | 2 | 0 | 4 | 32.575        |               | 2.7466    | 88584.67   | 44.22 |

|    |    |   |   |   |        |        |           |       |
|----|----|---|---|---|--------|--------|-----------|-------|
| 28 | 7  | 0 | 1 | 4 | 33.545 | 2.6694 | 28568.93  | 25.92 |
| 29 | 5  | 2 | 0 | 4 | 34.260 | 2.6153 | 2745.55   | 8.22  |
| 30 | 6  | 1 | 1 | 8 | 34.441 | 2.6020 | 12263.31  | 12.36 |
| 31 | 9  | 1 | 0 | 4 | 34.702 | 2.5829 | 3383.15   | 9.26  |
| 32 | 10 | 0 | 0 | 2 | 34.909 | 2.5681 | 120.00    | 2.48  |
| 33 | 6  | 2 | 0 | 4 | 36.225 | 2.4778 | 11832.10  | 18.14 |
| 34 | 7  | 1 | 1 | 8 | 36.743 | 2.4440 | 16876.98  | 15.56 |
| 35 | 0  | 2 | 1 | 4 | 37.524 | 2.3949 | 5639.40   | 13.02 |
| 36 | 1  | 2 | 1 | 8 | 37.693 | 2.3846 | 11392.76  | 13.15 |
| 37 | 10 | 1 | 0 | 4 | 38.007 | 2.3656 | 86911.90  | 51.84 |
| 38 | 2  | 2 | 1 | 8 | 38.196 | 2.3543 | 29554.31  | 21.50 |
| 39 | 7  | 2 | 0 | 4 | 38.435 | 2.3402 | 246.13    | 2.79  |
| 40 | 3  | 2 | 1 | 8 | 39.022 | 2.3064 | 42054.89  | 26.26 |
| 41 | 9  | 0 | 1 | 4 | 39.116 | 2.3011 | 128462.94 | 65.07 |
| 42 | 8  | 1 | 1 | 8 | 39.255 | 2.2932 | 31856.75  | 23.00 |
| 43 | 4  | 2 | 1 | 8 | 40.154 | 2.2439 | 7183.60   | 11.20 |
| 44 | 8  | 2 | 0 | 4 | 40.859 | 2.2068 | 57472.69  | 45.68 |
| 45 | 11 | 1 | 0 | 4 | 41.397 | 2.1794 | 40552.74  | 38.94 |
| 46 | 5  | 2 | 1 | 8 | 41.573 | 2.1706 | 49944.03  | 30.70 |
| 47 | 9  | 1 | 1 | 8 | 41.949 | 2.1520 | 40697.88  | 28.00 |
| 48 | 12 | 0 | 0 | 2 | 42.192 | 2.1401 | 238.19    | 4.31  |
| 49 | 6  | 2 | 1 | 8 | 43.254 | 2.0900 | 88701.84  | 42.77 |
| 50 | 9  | 2 | 0 | 4 | 43.470 | 2.0801 | 37066.86  | 39.32 |
| 51 | 0  | 3 | 0 | 2 | 44.698 | 2.0258 | 12012.77  | 32.67 |
| 52 | 10 | 1 | 1 | 8 | 44.801 | 2.0214 | 32422.54  | 26.90 |
| 53 | 1  | 3 | 0 | 4 | 44.844 | 2.0195 | 68.29     | 1.75  |
| 54 | 12 | 1 | 0 | 4 | 44.865 | 2.0186 | 36693.98  | 40.54 |
| 55 | 7  | 2 | 1 | 8 | 45.176 | 2.0055 | 85478.46  | 44.10 |
| 56 | 11 | 0 | 1 | 4 | 45.259 | 2.0020 | 17520.76  | 28.29 |
| 57 | 2  | 3 | 0 | 4 | 45.281 | 2.0011 | 24.91     | 1.07  |
| 58 | 3  | 3 | 0 | 4 | 46.002 | 1.9714 | 1994.72   | 9.72  |

|    |    |   |   |   |        |        |           |       |
|----|----|---|---|---|--------|--------|-----------|-------|
| 59 | 10 | 2 | 0 | 4 | 46.247 | 1.9615 | 28099.27  | 36.72 |
| 60 | 0  | 0 | 2 | 2 | 46.648 | 1.9455 | 18312.95  | 42.33 |
| 61 | 4  | 3 | 0 | 4 | 46.997 | 1.9319 | 326.67    | 4.03  |
| 62 | 2  | 0 | 2 | 4 | 47.212 | 1.9236 | 143.18    | 2.68  |
| 63 | 8  | 2 | 1 | 8 | 47.317 | 1.9196 | 17284.69  | 20.90 |
| 64 | 11 | 1 | 1 | 8 | 47.796 | 1.9015 | 7308.27   | 13.74 |
| 65 | 5  | 3 | 0 | 4 | 48.253 | 1.8845 | 1984.43   | 10.24 |
| 66 | 13 | 1 | 0 | 4 | 48.411 | 1.8787 | 22394.70  | 34.52 |
| 67 | 4  | 0 | 2 | 4 | 48.876 | 1.8619 | 4130.15   | 14.99 |
| 68 | 0  | 1 | 2 | 4 | 49.130 | 1.8529 | 55403.59  | 55.22 |
| 69 | 11 | 2 | 0 | 4 | 49.174 | 1.8513 | 4659.98   | 16.03 |
| 70 | 1  | 1 | 2 | 8 | 49.266 | 1.8481 | 51294.88  | 37.69 |
| 71 | 9  | 2 | 1 | 8 | 49.658 | 1.8344 | 65193.73  | 42.87 |
| 72 | 14 | 0 | 0 | 2 | 49.659 | 1.8344 | 756.26    | 9.24  |
| 73 | 2  | 1 | 2 | 8 | 49.673 | 1.8339 | 58355.51  | 40.57 |
| 74 | 6  | 3 | 0 | 4 | 49.755 | 1.8311 | 140636.43 | 89.25 |
| 75 | 3  | 1 | 2 | 8 | 50.346 | 1.8110 | 10748.17  | 17.68 |
| 76 | 0  | 3 | 1 | 4 | 50.769 | 1.7969 | 1683.60   | 9.99  |
| 77 | 1  | 3 | 1 | 8 | 50.902 | 1.7925 | 5940.93   | 13.31 |
| 78 | 12 | 1 | 1 | 8 | 50.921 | 1.7918 | 16113.45  | 21.93 |
| 79 | 4  | 1 | 2 | 8 | 51.277 | 1.7803 | 18835.06  | 23.90 |
| 80 | 2  | 3 | 1 | 8 | 51.299 | 1.7795 | 5134.61   | 12.49 |
| 81 | 7  | 3 | 0 | 4 | 51.489 | 1.7734 | 2822.13   | 13.15 |
| 82 | 6  | 0 | 2 | 4 | 51.559 | 1.7712 | 13852.89  | 29.17 |
| 83 | 13 | 0 | 1 | 4 | 51.864 | 1.7615 | 22848.82  | 37.71 |
| 84 | 3  | 3 | 1 | 8 | 51.957 | 1.7585 | 55612.74  | 41.69 |
| 85 | 14 | 1 | 0 | 4 | 52.034 | 1.7561 | 2506.80   | 12.54 |
| 86 | 10 | 2 | 1 | 8 | 52.181 | 1.7515 | 16195.87  | 22.61 |
| 87 | 12 | 2 | 0 | 4 | 52.239 | 1.7497 | 17109.86  | 32.90 |
| 88 | 5  | 1 | 2 | 8 | 52.456 | 1.7430 | 11193.75  | 18.91 |
| 89 | 4  | 3 | 1 | 8 | 52.868 | 1.7304 | 2644.53   | 9.27  |

|     |    |   |   |   |        |        |          |       |
|-----|----|---|---|---|--------|--------|----------|-------|
| 90  | 8  | 3 | 0 | 4 | 53.440 | 1.7132 | 409.02   | 5.22  |
| 91  | 6  | 1 | 2 | 8 | 53.873 | 1.7004 | 62807.56 | 46.17 |
| 92  | 5  | 3 | 1 | 8 | 54.023 | 1.6961 | 1840.76  | 7.93  |
| 93  | 13 | 1 | 1 | 8 | 54.169 | 1.6918 | 13120.97 | 21.23 |
| 94  | 11 | 2 | 1 | 8 | 54.874 | 1.6718 | 15319.47 | 23.28 |
| 95  | 8  | 0 | 2 | 4 | 55.157 | 1.6638 | 861.13   | 7.85  |
| 96  | 6  | 3 | 1 | 8 | 55.412 | 1.6568 | 1120.01  | 6.37  |
| 97  | 13 | 2 | 0 | 4 | 55.431 | 1.6563 | 5497.81  | 19.95 |
| 98  | 7  | 1 | 2 | 8 | 55.516 | 1.6539 | 28298.07 | 32.07 |
| 99  | 9  | 3 | 0 | 4 | 55.592 | 1.6519 | 2861.54  | 14.44 |
| 100 | 15 | 1 | 0 | 4 | 55.735 | 1.6479 | 6.91     | 0.71  |
| 101 | 0  | 2 | 2 | 4 | 56.085 | 1.6385 | 42914.97 | 56.50 |

#=No. of peak; m=multiplicity; c = calculated; o = observed;



**Table S4.** Thin film XRD data and calculated d-spacings of **2**.

| Pos./°2Th. | Height/cts | FWHM/°2Th. | d-spacing/Å | Rel. Int./% |
|------------|------------|------------|-------------|-------------|
| 6.6462     | 4120.34    | 0.0780     | 13.28871    | 100.00      |
| 13.1660    | 252.04     | 0.0781     | 6.71913     | 6.12        |
| 19.7334    | 1634.62    | 0.0775     | 4.49530     | 39.67       |
| 26.3600    | 193.09     | 0.0779     | 3.37834     | 4.69        |
| 33.0891    | 476.75     | 0.0805     | 2.70507     | 11.57       |
| 39.9434    | 53.81      | 0.1098     | 2.25526     | 1.31        |
| 46.9351    | 21.41      | 0.1361     | 1.93431     | 0.52        |
| 54.1147    | 53.44      | 0.1098     | 1.69340     | 1.30        |

Pos. = peak position in the diffractogram; cts = counts; Rel. Int. = relative intensity.

**Table S5.** Indexed thin film diffraction data of **2**.

Thin film unit cell of **2** (indexing method: DICVOL91):  $a=27.08(7)$ ,  $b=6.8(3)$ ,  $c=4.78(1)$ ,  $\alpha=\beta=\gamma=90^\circ$ ; orthorhombic P; refined unit cell only and  $h=20$ ,  $k=0$ ,  $l=0$ ; Snyder FOM 9.51.

| #  | h  | k | l | Sin <sup>2</sup> (c) | Sin <sup>2</sup> (o) | Sin <sup>2</sup> (d) | 2Th(c)/° | 2Th(o)/° | 2Th(d)/° | d-sp(c)/Å     | d-sp(o)/Å | d-sp (d)/Å |
|----|----|---|---|----------------------|----------------------|----------------------|----------|----------|----------|---------------|-----------|------------|
| 1  | 1  | 0 | 0 | 81                   |                      |                      | 3.2601   |          |          | 27.07925<br>0 |           |            |
| 2  | 2  | 0 | 0 | 324                  | 336                  | -12                  | 6.5229   | 6.6462   | -0.1233  | 13.53963<br>0 | 13.288710 | 0.250917   |
| 3  | 3  | 0 | 0 | 728                  |                      |                      | 9.7910   |          |          | 9.026417      |           |            |
| 4  | 4  | 0 | 0 | 1295                 | 1314                 | -19                  | 13.0670  | 13.1660  | -0.0990  | 6.769813      | 6.719129  | 0.050683   |
| 5  | 5  | 0 | 0 | 2023                 |                      |                      | 16.3539  |          |          | 5.415850      |           |            |
| 6  | 6  | 0 | 0 | 2913                 | 2936                 | -23                  | 19.6543  | 19.7334  | -0.0791  | 4.513208      | 4.495301  | 0.017907   |
| 7  | 7  | 0 | 0 | 3965                 |                      |                      | 22.9713  |          |          | 3.868464      |           |            |
| 8  | 8  | 0 | 0 | 5179                 | 5199                 | -20                  | 26.3080  | 26.3600  | -0.0521  | 3.384906      | 3.378340  | 0.006567   |
| 9  | 9  | 0 | 0 | 6554                 |                      |                      | 29.6675  |          |          | 3.008806      |           |            |
| 10 | 10 | 0 | 0 | 8092                 | 8109                 | -17                  | 33.0533  | 33.0891  | -0.0359  | 2.707925      | 2.705072  | 0.002854   |
| 11 | 11 | 0 | 0 | 9791                 |                      |                      | 36.4690  |          |          | 2.461750      |           |            |
| 12 | 12 | 0 | 0 | 11652                | 11666                | -14                  | 39.9187  | 39.9434  | -0.0247  | 2.256604      | 2.255265  | 0.001339   |
| 13 | 13 | 0 | 0 | 13675                |                      |                      | 43.4065  |          |          | 2.083019      |           |            |
| 14 | 14 | 0 | 0 | 15860                | 15859                | 1                    | 46.9371  | 46.9351  | 0.0020   | 1.934232      | 1.934308  | -0.000076  |
| 15 | 15 | 0 | 0 | 18207                |                      |                      | 50.5155  |          |          | 1.805283      |           |            |
| 16 | 16 | 0 | 0 | 20715                | 20692                | 23                   | 54.1476  | 54.1147  | 0.0328   | 1.692453      | 1.693403  | -0.000950  |
| 17 | 17 | 0 | 0 | 23385                |                      |                      | 57.8394  |          |          | 1.592897      |           |            |

# = peak number; (c)=calculated; (o)=observed; (d)=difference between calculated and observed; d-sp = d-spacing.
